# Supplementary material
Source: PubMed Central journal article supplement (PMC8059370)
Supplement: mmc1.pdf [file mmc1.pdf]

## Supplemental information

### Low-coverage sequencing cost-effectively

### detects known and novel variation

### in underrepresented populations

Alicia R. Martin, Elizabeth G. Atkinson, Sinéad B. Chapman, Anne Stevenson, Rocky E. Stroud, Tamrat Abebe, Dickens Akena, Melkam Alemayehu, Fred K. Ashaba, Lukoye Atwoli, Tera Bowers, Lori B. Chibnik, Mark J. Daly, Timothy DeSmet, Sheila Dodge, Abebaw Fekadu, Steven Ferriera, Bizu Gelaye, Stella Gichuru, Wilfred E. Injera, Roxanne James, Symon M. Kariuki, Gabriel Kigen, Karestan C. Koenen, Edith Kwobah, Joseph Kyebuzibwa, Lerato Majara, Henry Musinguzi, Rehema M. Mwema, Benjamin M. Neale, Carter P. Newman, Charles R.J.C. Newton, Joseph K. Pickrell, Raj Ramesar, Welleta Shiferaw, Dan J. Stein, Solomon Teferra, Celia van der Merwe, Zukiswa Zingela, and the NeuroGAP-Psychosis Study Team

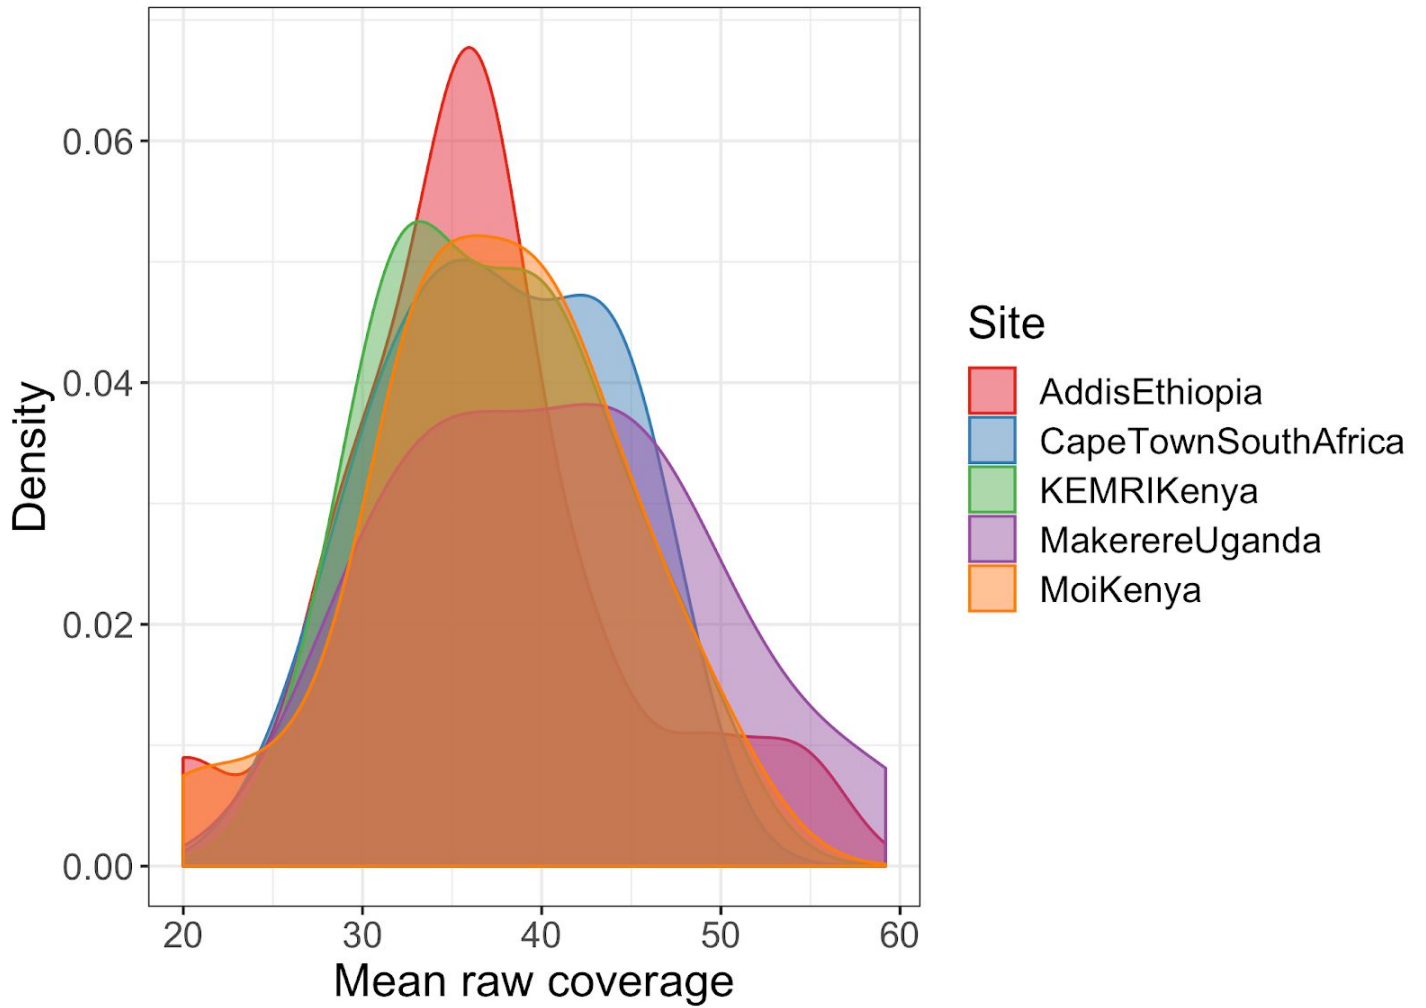

**Figure S1 - Mean coverage across 91 NeuroGAP whole genomes.**

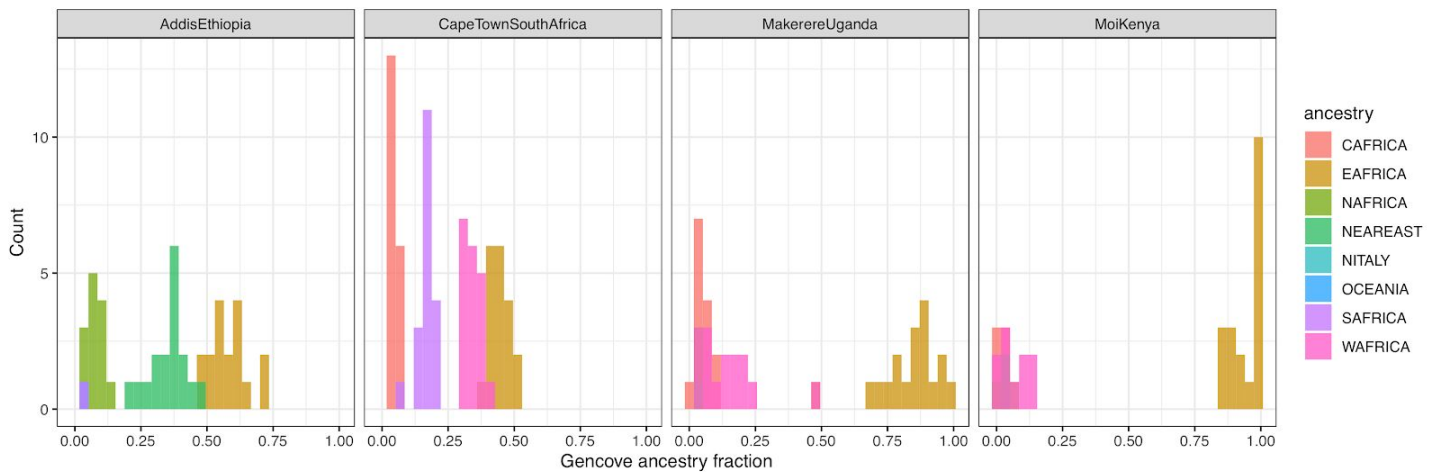

**Figure S2 - Ancestry report generated by Gencove.**

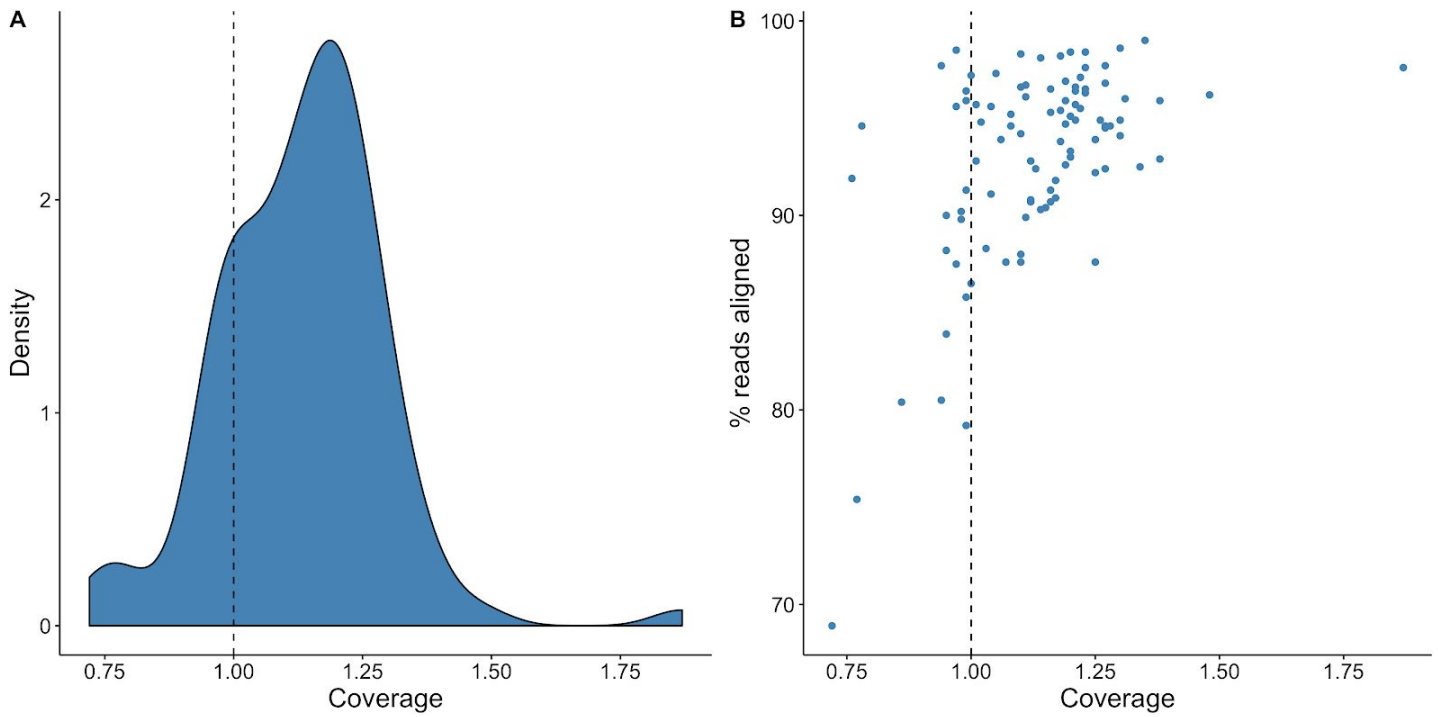

**Figure S3 - Actual WGS coverage when targeting 1X across 95 NeuroGAP samples. A) Coverage across all samples. B) Coverage and percent read alignment.**

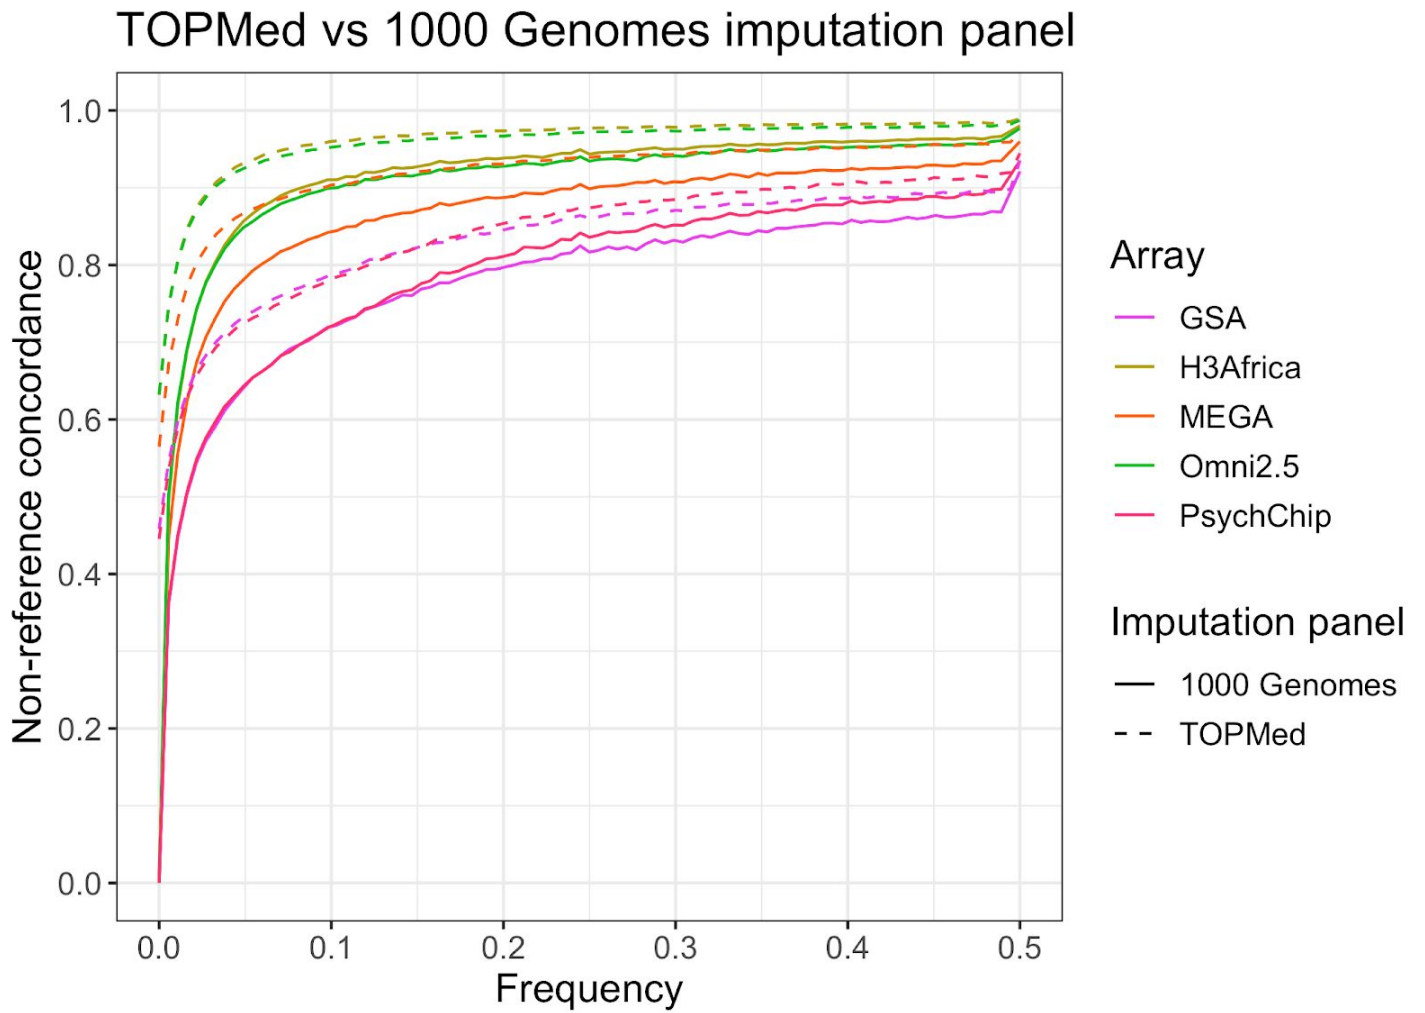

**Figure S4 - Comparison of imputation accuracy from various GWAS arrays in NeuroGAP using the 1000 Genomes versus TOPMed imputation panels.** Note: Because the TOPMed imputation panel does not support genotype refinement, imputation quality could not be compared for low-coverage sequencing.

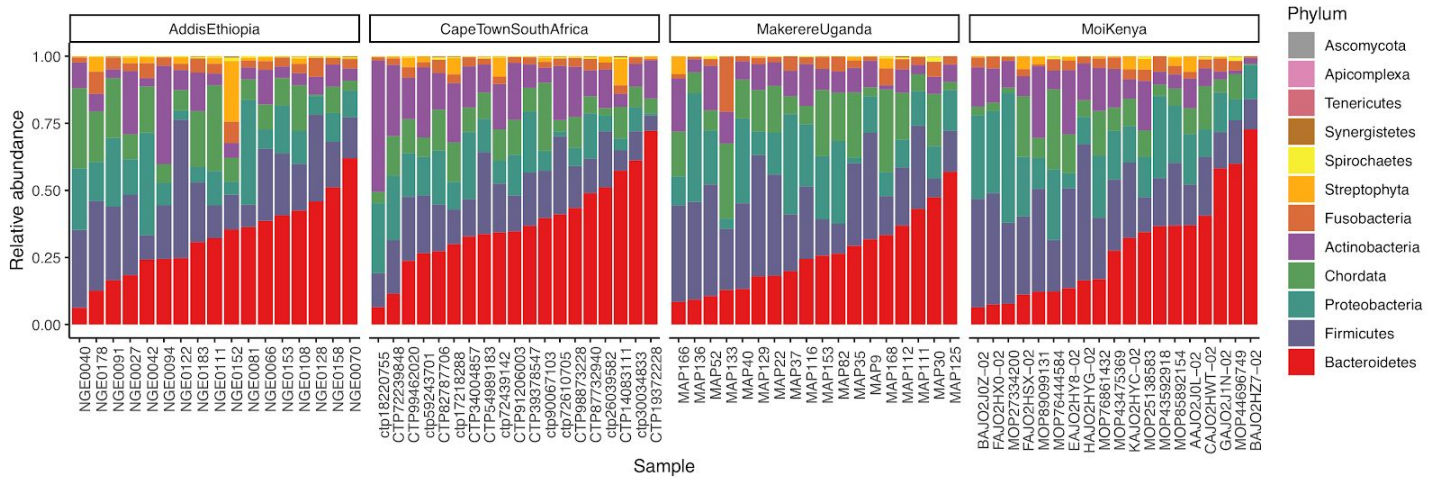

**Figure S5 - Phylum-level microbiome variation.** Results were generated using Kraken 1.0 with unmapped reads from the 6X coverage downsampled data. All phyla with a non-zero relative abundance across individuals are shown, in order of mean abundance (i.e. bacteroidetes on bottom have the highest mean relative abundance), and individuals are ordered within site based on their relative abundance of the most frequent phylum.

**Table S1 - Counts of primary self-reported ethnicities by project site**

| NeuroGAP site       | Primary ethnicity      | Count |
|---------------------|------------------------|-------|
| AddisEthiopia       | Amhara                 | 8     |
| AddisEthiopia       | Oromo                  | 5     |
| AddisEthiopia       | Sebat Bet Gurage       | 1     |
| AddisEthiopia       | Sidama                 | 1     |
| AddisEthiopia       | Silt'e                 | 1     |
| AddisEthiopia       | Sodo Gurage            | 1     |
| CapeTownSouthAfrica | Xhosa                  | 17    |
| CapeTownSouthAfrica | Other (please specify) | 1     |
| CapeTownSouthAfrica | Zulu                   | 1     |
| KEMRIKenya          | Mijikenda              | 10    |
| KEMRIKenya          | Kamba                  | 2     |
| KEMRIKenya          | Luhya                  | 2     |
| KEMRIKenya          | Chonyi                 | 1     |
| KEMRIKenya          | Giriama                | 1     |
| KEMRIKenya          | Meru                   | 1     |
| KEMRIKenya          | Other (please specify) | 1     |
| MakerereUganda      | Baganda                | 3     |

|                |            |   |
|----------------|------------|---|
| MakerereUganda | Lugbara    | 3 |
| MakerereUganda | Banyankore | 2 |
| MakerereUganda | Basoga     | 2 |
| MakerereUganda | Iteso      | 2 |
| MakerereUganda | Bafumbira  | 1 |
| MakerereUganda | Bakonz     | 1 |
| MakerereUganda | Banyoro    | 1 |
| MakerereUganda | Karimojong | 1 |
| MakerereUganda | Madi       | 1 |
| MakerereUganda | Sabiny     | 1 |
| MoiKenya       | Kalenjin   | 9 |
| MoiKenya       | Kikuyu     | 4 |
| MoiKenya       | Luhya      | 4 |
| MoiKenya       | Luo        | 2 |

**Table S2 - Sensitivity and quality control metrics from downsampling experiment using raw variant call metrics.** The metrics at the top of the table (TOTAL\_SNPS through NUM\_SINGLETONS) were produced by the Picard software. Values in the lower rows were produced by custom scripts (**Data and Code Availability**). Common variants here are defined as having > 5 copies (i.e. MAF>3%).

| Depth                        | 0.5X      | 1X         | 2X         | 4X         | 6X         | 10X        | 20X        | All reads  |
|------------------------------|-----------|------------|------------|------------|------------|------------|------------|------------|
| TOTAL_SNPS                   | 9,236,562 | 13,036,891 | 15,716,019 | 20,958,987 | 23,352,341 | 24,955,954 | 25,136,680 | 26,093,644 |
| PCT_DBSNP                    | 0.81      | 0.79       | 0.83       | 0.77       | 0.74       | 0.72       | 0.73       | 0.71       |
| DBSNP_TITV                   | 2.11      | 2.13       | 2.15       | 2.16       | 2.17       | 2.18       | 2.18       | 2.18       |
| NOVEL_TITV                   | 1.6       | 1.6        | 1.84       | 1.92       | 1.95       | 1.98       | 1.93       | 1.9        |
| TOTAL_INDELS                 | 1,330,023 | 1,813,310  | 2,382,243  | 2,962,429  | 3,311,102  | 3,269,766  | 3,033,225  | 3,034,130  |
| PCT_DBSNP_INDELS             | 0.77      | 0.68       | 0.58       | 0.49       | 0.45       | 0.46       | 0.5        | 0.5        |
| DBSNP_INS_DEL_RATIO          | 0.81      | 0.76       | 0.7        | 0.67       | 0.66       | 0.65       | 0.66       | 0.66       |
| NOVEL_INS_DEL_RATIO          | 0.51      | 0.48       | 0.41       | 0.37       | 0.39       | 0.49       | 0.63       | 0.66       |
| TOTAL_MULTIALLELIC_SNPS      | 51,827    | 114,941    | 193,097    | 324,576    | 395,427    | 458,749    | 471,974    | 406,266    |
| NUM_IN_DB_SNP_MULTIALLELIC   | 44,922    | 94,856     | 152,005    | 237,526    | 277,126    | 307,149    | 305,615    | 264,302    |
| TOTAL_COMPLEX_INDELS         | 195,879   | 414,268    | 625,125    | 828,820    | 996,225    | 1,117,219  | 1,211,503  | 1,238,754  |
| NUM_IN_DB_SNP_COMPLEX_INDELS | 182,848   | 375,943    | 544,172    | 684,130    | 778,092    | 833,033    | 867,798    | 876,455    |
| SNP_REFERENCE_BIAS           | 0.38      | 0.38       | 0.41       | 0.45       | 0.47       | 0.5        | 0.5        | 0.51       |
| NUM_SINGLETONS               | 1,161,967 | 2,215,593  | 3,777,977  | 7,040,205  | 8,697,345  | 9,579,361  | 9,264,341  | 9,505,281  |
| n_hom_ref (mean)             | 3,171,751 | 7,898,931  | 14,346,304 | 23,134,834 | 26,670,673 | 28,641,510 | 28,468,205 | 31,926,975 |

|                                         |         |         |           |           |           |           |           |           |
|-----------------------------------------|---------|---------|-----------|-----------|-----------|-----------|-----------|-----------|
| n_het (mean)                            | 45,177  | 170,224 | 621,024   | 1,795,694 | 2,720,851 | 3,630,054 | 4,109,947 | 4,148,694 |
| n_hom_alt (mean)                        | 322,066 | 736,349 | 1,414,176 | 1,984,122 | 2,056,318 | 2,013,028 | 1,986,839 | 1,924,021 |
| Fraction singletons present in full set | 0.04    | 0.09    | 0.2       | 0.45      | 0.62      | 0.8       | 0.93      | 1         |
| Fraction of 2-5 copy sites in full set  | 0.09    | 0.21    | 0.42      | 0.7       | 0.81      | 0.88      | 0.94      | 1         |
| Fraction common variants in full set    | 0.55    | 0.74    | 0.88      | 0.95      | 0.97      | 0.98      | 0.99      | 1         |
| Genome-wide concordance                 | 0.22    | 0.42    | 0.66      | 0.86      | 0.93      | 0.97      | 0.98      | 1         |

**Table S3 - Raw SNP and indel non-reference variant concordance from low-coverage genomes with full coverage genomes prior to genotype refinement or imputation.** Concordance is averaged across variants of all allele frequencies.

| Depth | SNPs | Indels |
|-------|------|--------|
| 0.5X  | 0.12 | 0.10   |
| 1X    | 0.17 | 0.12   |
| 2X    | 0.30 | 0.19   |
| 4X    | 0.54 | 0.35   |
| 6X    | 0.70 | 0.49   |
| 10X   | 0.84 | 0.65   |
| 20X   | 0.91 | 0.83   |

**Table S4 - Non-reference concordance across methods and technologies.** Values reported are across all SNPs shown in **Figure 4**.

| Depth/array | Method  | Overall non-reference concordance |
|-------------|---------|-----------------------------------|
| 6X          | BEAGLE  | 0.975                             |
| 4X          | BEAGLE  | 0.959                             |
| 6X          | Gencove | 0.949                             |
| 4X          | Gencove | 0.94                              |
| H3Africa    | BEAGLE  | 0.932                             |
| Omni2.5     | BEAGLE  | 0.926                             |

|           |         |       |
|-----------|---------|-------|
| 2X        | Gencove | 0.924 |
| 2X        | BEAGLE  | 0.91  |
| 1X        | Gencove | 0.904 |
| MEGA      | BEAGLE  | 0.892 |
| 0.5X      | Gencove | 0.875 |
| PsychChip | BEAGLE  | 0.829 |
| GSA       | BEAGLE  | 0.816 |
| 1X        | BEAGLE  | 0.815 |
| 0.5X      | BEAGLE  | 0.681 |

**Table S5 - Average non-reference concordance across technologies and allele frequencies for each population.** Values for each site show non-reference concordance. The same imputation reference panel, 1000 Genomes phase 3 data, was used for all analyses, including as input to both BEAGLE and Gencove.

| Depth/array | Method  | AddisEthiopia | CapeTownSouthAfrica | KEMRIKenya | MakerereUganda | MoiKenya |
|-------------|---------|---------------|---------------------|------------|----------------|----------|
| 6X          | BEAGLE  | 0.961         | 0.964               | 0.971      | 0.97           | 0.968    |
| 4X          | BEAGLE  | 0.939         | 0.946               | 0.958      | 0.956          | 0.953    |
| H3Africa    | BEAGLE  | 0.922         | 0.91                | 0.949      | 0.941          | 0.94     |
| Omni2.5     | BEAGLE  | 0.918         | 0.902               | 0.944      | 0.935          | 0.934    |
| 6X          | Gencove | 0.908         | 0.909               | N/A        | 0.929          | 0.927    |
| 4X          | Gencove | 0.899         | 0.9                 | N/A        | 0.923          | 0.92     |
| 2X          | Gencove | 0.883         | 0.882               | N/A        | 0.911          | 0.908    |
| 2X          | BEAGLE  | 0.877         | 0.892               | 0.919      | 0.913          | 0.907    |
| MEGA        | BEAGLE  | 0.88          | 0.861               | 0.918      | 0.901          | 0.902    |
| 1X          | Gencove | 0.862         | 0.862               | N/A        | 0.894          | 0.891    |
| 0.5X        | Gencove | 0.831         | 0.833               | N/A        | 0.869          | 0.865    |
| PsychChip   | BEAGLE  | 0.808         | 0.798               | 0.864      | 0.836          | 0.839    |
| GSA         | BEAGLE  | 0.796         | 0.782               | 0.854      | 0.822          | 0.827    |
| 1X          | BEAGLE  | 0.771         | 0.795               | 0.835      | 0.82           | 0.813    |
| 0.5X        | BEAGLE  | 0.639         | 0.663               | 0.709      | 0.683          | 0.68     |

**Table S6 - Costs of reagents for sequencing and genotyping options including sequencing volume discounts.** We aggregated list prices of reagents from Illumina's website as of April 10, 2020. These prices notably do not include sample and library preparation costs, which we assume to be comparable between GWAS arrays and sequencing approaches. The H3Africa array is not commercially listed on Illumina's site and is thus not included here. Sequencing reagent costs assume Illumina's list price of the NovaSeq 6000 S4 Reagent Kit. Bulk pricing listed at \$240,000 for 10 flow cells (\$24,000/flow cell), \$456,000 for 20 flow cells

(\$22,800/flow cell), and \$768,000 for 40 flow cells (\$19,200/flow cell) reduces costs at large scales. Rows are sorted based on the largest bulk purchasing cost.

| Depth/Array | List cost | Bulk purchasing (10 flow cells for \$240,000) | Bulk purchasing (20 flow cells for \$456,000) | Bulk purchasing (40 flow cells for \$768,000) |
|-------------|-----------|-----------------------------------------------|-----------------------------------------------|-----------------------------------------------|
| 30X         | 1,320.83  | \$1,000.00                                    | \$950.00                                      | \$800.00                                      |
| 20X         | \$880.55  | \$666.67                                      | \$633.33                                      | \$533.33                                      |
| Omni2.5     | \$184.43  | \$184.43                                      | \$184.43                                      | \$184.43                                      |
| 6X          | \$264.17  | \$200.00                                      | \$190.00                                      | \$160.00                                      |
| MEGA Global | \$119.00  | \$119.00                                      | \$119.00                                      | \$119.00                                      |
| 4X          | \$176.11  | \$133.33                                      | \$126.67                                      | \$106.67                                      |
| PsychChip   | \$71.38   | \$71.38                                       | \$71.38                                       | \$71.38                                       |
| 2X          | \$88.06   | \$66.67                                       | \$63.33                                       | \$53.33                                       |
| GSA         | \$49.00   | \$49.00                                       | \$49.00                                       | \$49.00                                       |
| 1X          | \$44.03   | \$33.33                                       | \$31.67                                       | \$26.67                                       |
| 0.5X        | \$22.01   | \$16.67                                       | \$15.83                                       | \$13.33                                       |
| H3Africa    | Unknown   | Unknown                                       | Unknown                                       | Unknown                                       |

**Table S7 - Compute times for genotype refinement and imputation using BEAGLE.** We assume a computational cost of \$0.02 / CPU hour run on custom machines with 11 Gb of RAM as these were run across ~1000 shards on Google Cloud preemptible nodes. Costs were divided across 93 samples, 2 of which were dropped from analysis due to contamination. Some values are missing because job failures required multiple iterations of resubmissions.

| Depth/Array | Step       | Total run time (s) | Cost per sample |
|-------------|------------|--------------------|-----------------|
| 0.5X        | Refinement | 3218175            | \$0.19          |
| 1X          | Refinement | 5443643            | \$0.33          |
| 2X          | Refinement | 8962256            | \$0.54          |
| 4X          | Refinement | 14103035           | \$0.84          |
| 0.5X        | Imputation | 576078             | \$0.03          |
| 1X          | Imputation | 536017             | \$0.03          |
| 2X          | Imputation | 581023             | \$0.03          |
| Omni2.5     | Imputation | 381759             | \$0.02          |
| H3Africa    | Imputation | 362223             | \$0.02          |
| MEGA        | Imputation | 326611             | \$0.02          |
| PsychChip   | Imputation | 292045             | \$0.02          |
| GSA         | Imputation | 287468             | \$0.02          |
